# Supplementary material for: Epidermal growth factor receptor-targeted lipid nanoparticles retain self-assembled nanostructures and provide high specificity
Source: Royal Society of Chemistry journal article supplement (doi:10.1039/c4nr05200e), 2014-12-08
Supplement: c4nr05200e1.pdf [file c4nr05200e1.pdf]

## Electronic Supplementary Information

### **Epidermal growth factor receptor-targeted lipid nanoparticles retain self-assembled nanostructures and provide high specificity**

Jiali Zhai<sup>1\*</sup>, Judith A. Scoble<sup>2</sup>, Nan Li<sup>1,3</sup>, George Lovrecz<sup>1</sup>, Lynne J. Waddington<sup>2</sup>, Nhiem Tran<sup>1</sup>, Benjamin W. Muir<sup>1</sup>, Gregory Coia<sup>2</sup>, Nigel Kirby<sup>5</sup>, Calum J. Drummond<sup>4</sup>, Xavier Mulet<sup>1\*</sup>

<sup>1</sup> CSIRO Manufacturing Flagship, Private Bag 10, Clayton, VIC 3169, Australia

<sup>2</sup> CSIRO Manufacturing Flagship, 343 Royal Parade, Parkville, VIC 3052, Australia

<sup>3</sup> Department of Respiratory Medicine, Shanghai Pulmonary Hospital, Tongji University School of Medicine, Shanghai 200433, China

<sup>4</sup> School of Applied Sciences, College of Science Engineering and Health, RMIT University, GPO Box 2476, Melbourne, Vic 3001, Australia

<sup>5</sup> Australian Synchrotron, 800 Blackburn Rd, Clayton, Vic 3168, Australia

\*Corresponding authors: xavier.mulet@csiro.au; maggie.zhai@csiro.au

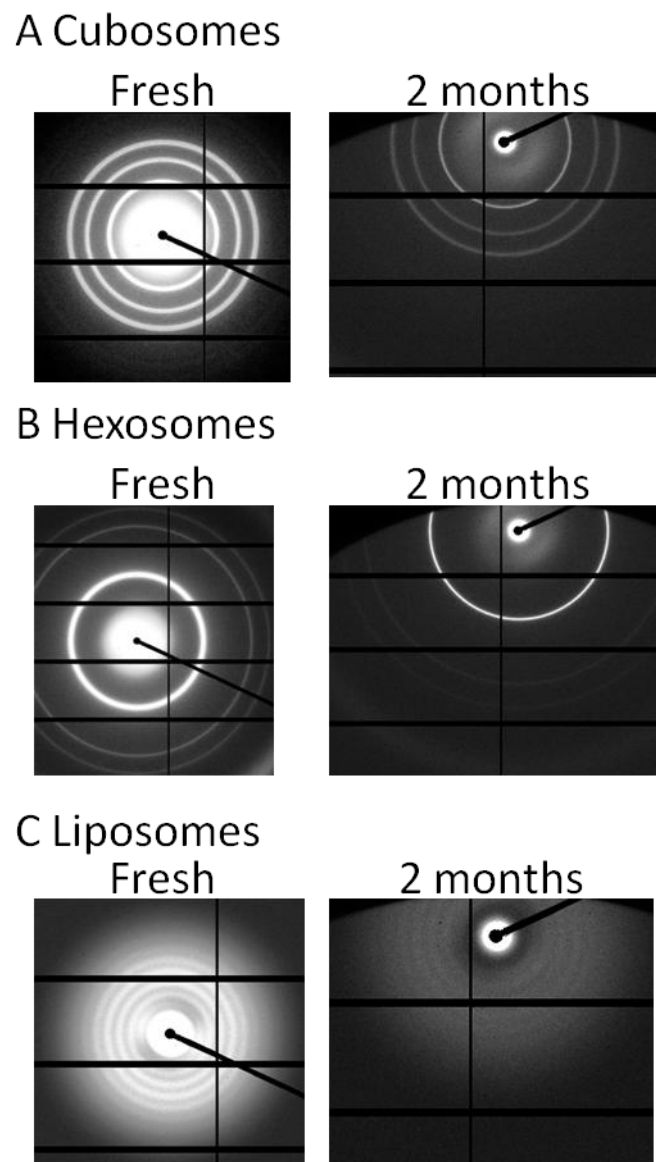

Figure S1: Synchrotron small angle X-ray (SAXS) 2D diffraction patterns of A) phytantriol cubosomes, B) phytantriol hexosomes, and C) unilamellar liposomes (DSPC:cholesterol). All nanoparticles contained 1 mM DSPE-PEG<sub>Mw=3400</sub>-mal as the functional ingredient. Detailed composition and the molar ratio are in Table 1.

Cubosomes before conjugation

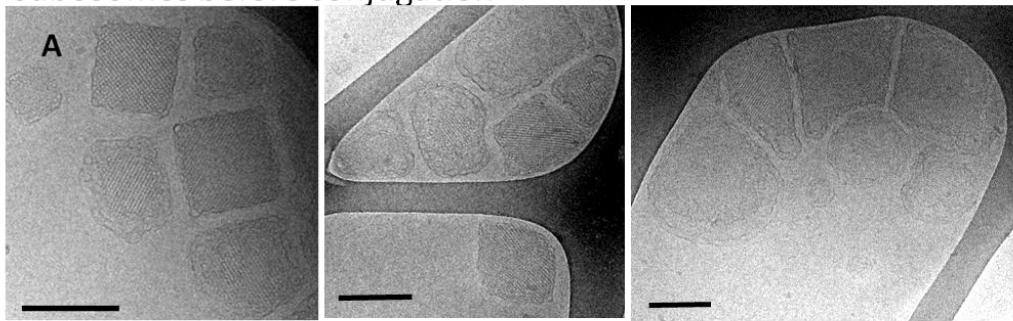

Cubosomes after conjugation

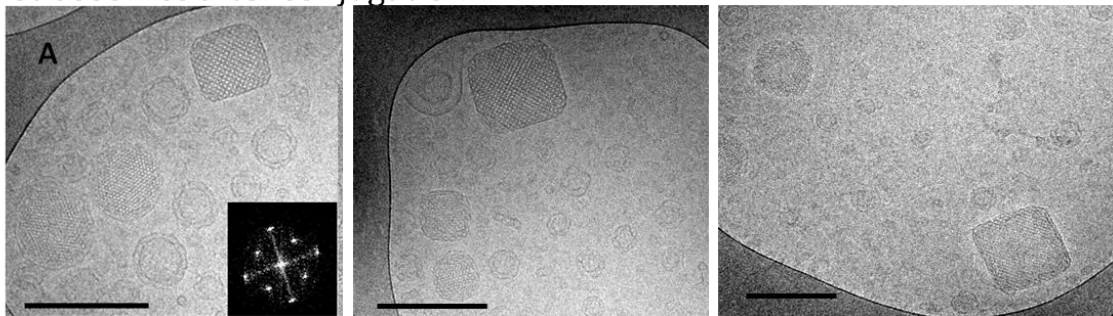

Hexosomes before conjugation

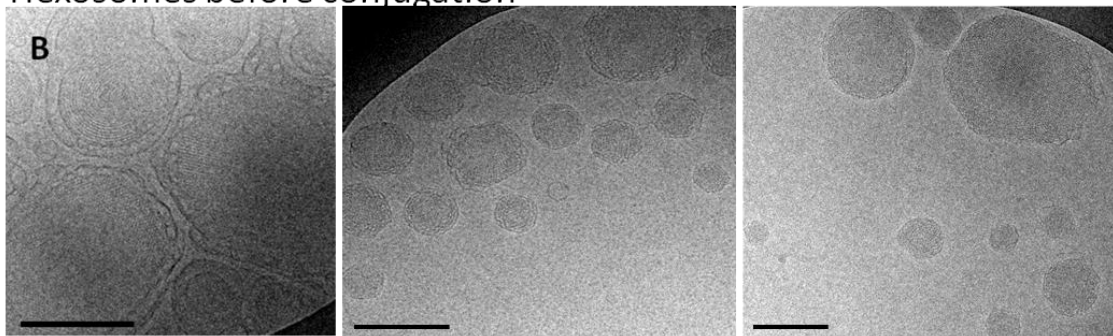

Hexosomes after conjugation

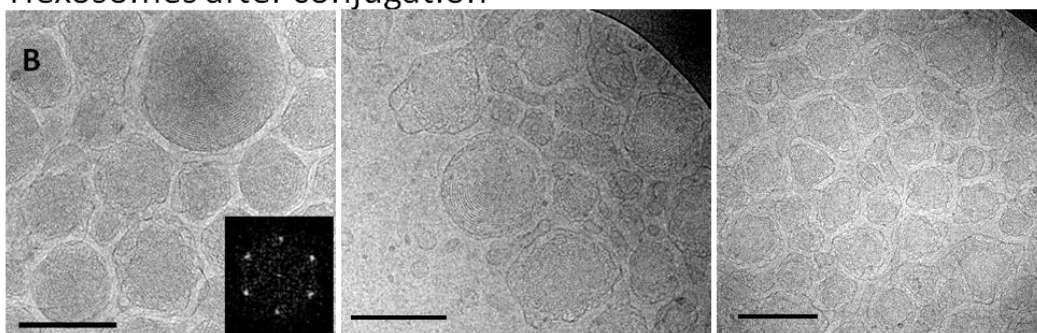

Liposomes before conjugation

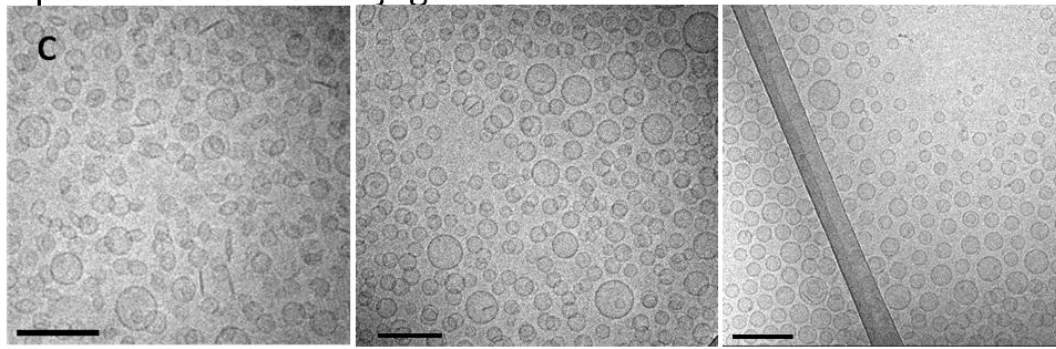

Liposomes after conjugation

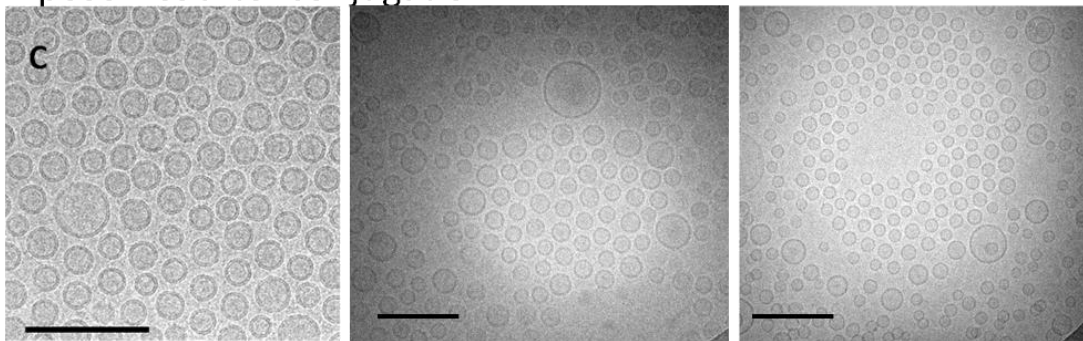

Figure S2: Representative cryo-TEM images of A) phytantriol cubosomes, B) phytantriol hexosomes, and C) unilamellar liposomes (DSPC:cholesterol) before and after conjugation reaction. Scale bars represent 200 nm.

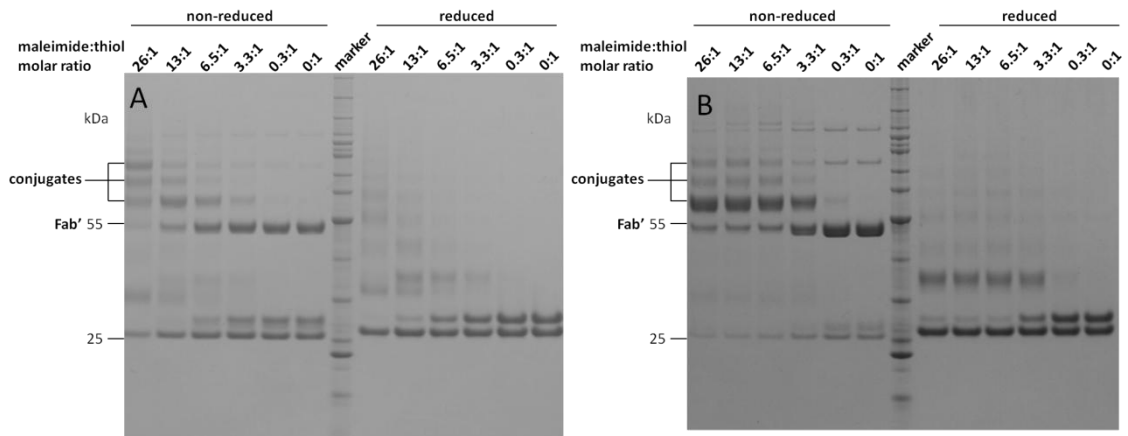

Figure S3: SDS-PAGE of conjugation of anti-EGFR Fab' to A) cubosomes and B) hexosomes at various ratios of DSPE-PEG-mal to the thiol groups of Fab'. Conjugation was performed at 4 °C overnight. Under the non-reduced condition, intact and conjugated Fab' were present. Under the reduced condition, samples were completely reduced by adding 0.5 M DTT as shown by the presence of the Fab' LC and conjugated HC.

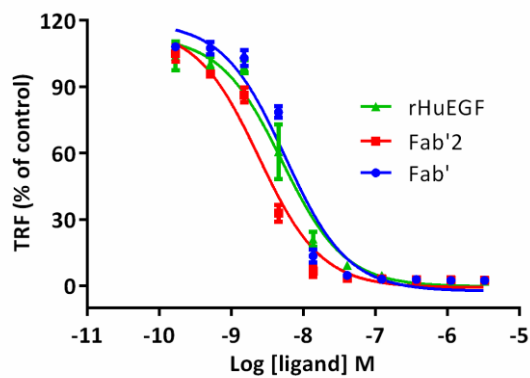

Figure S4: Ligand binding affinities of rHuEGF, anti-EGFR Fab'2 and Fab' of the 528 mAb. The competition assay was performed using Eu-EGF (100 pM) to dilute the ligands at a range of Fab' concentrations as indicated. TRF of europium in a mixture of Eu-EGF and the ligands was measured by a plate reader (Ex/Em filters = 340/615 nm, 400  $\mu$ s delay). Values are normalised to the signal of Eu-EGF alone (100%) with each assay point representing the mean of triplicates.
